# Supplementary material for: One-Pot Hydrothermal Synthesis of Magnetite Prussian Blue Nano-Composites and Their Application to Fabricate Glucose Biosensor
Source: MDPI journal article supplement (doi:10.3390/s16020243), 2016-02-18
Supplement: s1 [file s1]

# Supplementary Materials: One-Pot Hydrothermal Synthesis of Magnetite Prussian Blue Nano-Composites and Their Application to Fabricate Glucose Biosensor

Ezzaldeen Younes Jomma and Shou-Nian Ding

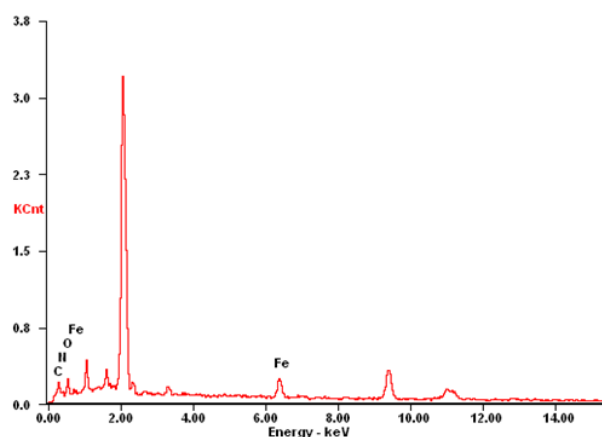

Figure S1. EDAX showing the elements content of the composite  $\text{Fe}_3\text{O}_4$ -Prussian blue.

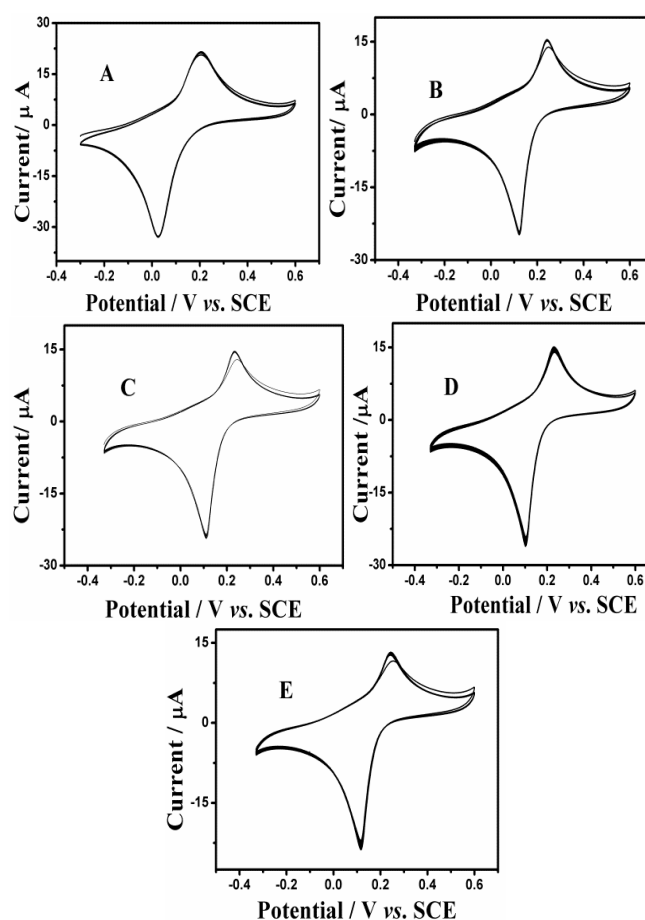

Figure S2. Multi-CVs of the  $\text{Fe}_3\text{O}_4$ -PB/GCE in 0.01 M Phosphate buffer solution (PBS) containing 0.1 M KCl at different pH values (A) 5.0, (B) 6.0, (C) 7.0, (D) 8.0, (E) 9.0.

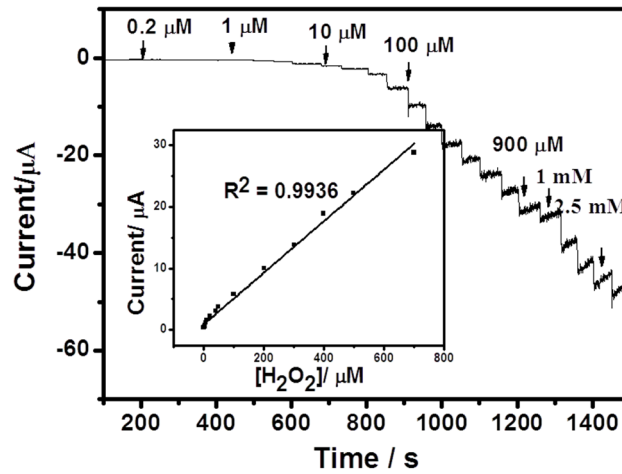

**Figure S3.** Current-time response of the  $\text{Fe}_3\text{O}_4\text{-PB/GCE}$  to the successive addition of  $\text{H}_2\text{O}_2$  in 0.01 M PBS (pH 6.0) + 0.1 M KCl under stirring at  $-0.1$  V. Insert: Plot of catalytic current *vs.*  $\text{H}_2\text{O}_2$  concentration.

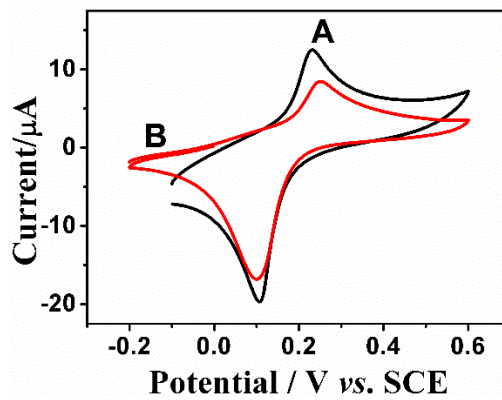

**Figure S4.** Typical CVs obtained at  $\text{Fe}_3\text{O}_4\text{-PB/GCE}$  (A) and  $\text{GOD-BSA/Fe}_3\text{O}_4\text{-PB/GCE}$  (B) in 0.01 M PBS (pH 6.0) + 0.1 M KCl. Scan rate:  $50 \text{ mV}\cdot\text{s}^{-1}$ .

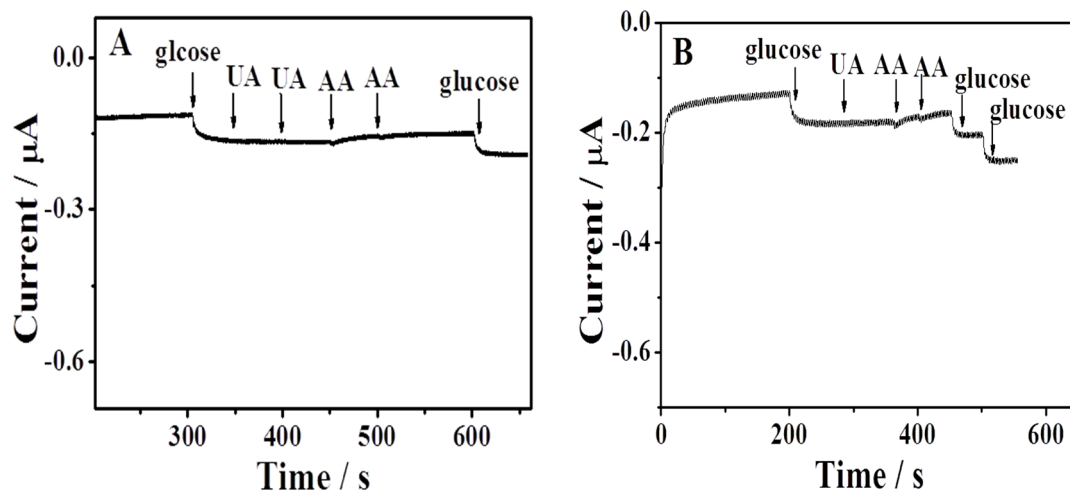

**Figure S5.** Typical Chronoamperometry (I-t) response of  $0.025 \mu\text{M}$  glucose and (A)  $0.1 \mu\text{M}$  AA and  $0.1 \mu\text{M}$  UA (B)  $0.2 \mu\text{M}$  AA and  $0.2 \mu\text{M}$  UA at  $\text{GOD-BSA/Fe}_3\text{O}_4\text{-PB/GCE}$ . Applied Potential:  $-0.15$  V.
